# Supplementary material for: Immunomodulatory Molecular Mechanisms of Luffa cylindrica for Downy Mildews Resistance Induced by Growth-Promoting Endophytic Fungi
Source: MDPI journal article supplement (doi:10.3390/jof8070689), 2022-06-29
Supplement: s1 [file s1]

## Supplementary Figure 1

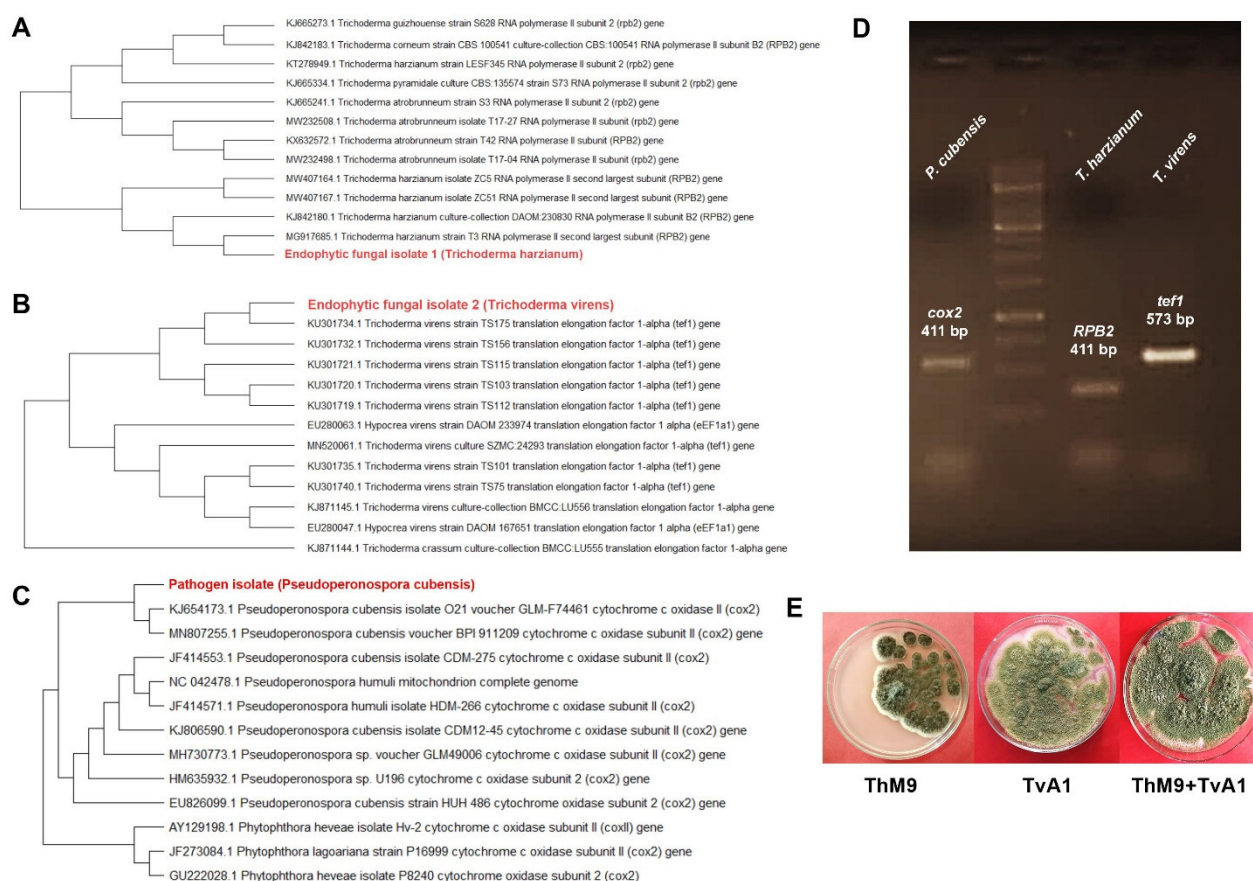

**Supplemental Figure S1.** Molecular identification of fungal endophytes (A) M9 (B) A1 and fungal pathogen (C) DM1 (D) specie identification for M9, A1, and DM1 using gene-specific primers (E) *In vitro* compatibility test for M9 and A1 endophytic fungi.
